# Supplementary material
Source: publisher site journal article supplement (https://www.spandidos-publications.com/5942/downloadSupplementary)
Supplement: Supplementary file 1 [file downloadSupplementary]

Table SI. Databases of lncRNAs-related information.

| Focus              | Databases        | Origins                    | Usage                                                                                                                                        | Advantages                                                                                                                                                                                                                                                                                                                                             | PubMed ID |
|--------------------|------------------|----------------------------|----------------------------------------------------------------------------------------------------------------------------------------------|--------------------------------------------------------------------------------------------------------------------------------------------------------------------------------------------------------------------------------------------------------------------------------------------------------------------------------------------------------|-----------|
| lncRNAs biogenesis | ChIPBase v2.0    | 10 species including Human | ChIPBase v2.0 can be used to illustrate the clinically relevant interactions between TFs and lncRNAs                                         | <ol style="list-style-type: none"> <li>1. Expanding with 20-fold ChIP-seq datasets</li> <li>2. Providing comprehensive annotations of transcriptional regulation of lncRNAs and PCGs</li> <li>3. Integrating a large number of RNA-seq and miRNA-seq data for researchers to explore the co-expression associations of TF-lncRNA and TF-PCG</li> </ol> | 27924033  |
| lncRNAs structure  | RMDB version 2.0 | -                          | RMDB version 2.0 offers interactive graphical browsing of lncRNAs structural, thermodynamic and kinetic data at single-nucleotide resolution | <ol style="list-style-type: none"> <li>1. Providing a new interface for more information about the probed lncRNAs at single-nucleotide resolution</li> <li>2. Providing the FORNA applet to display chemical mapping reactivity on lncRNAs secondary structures</li> <li>3. Simplifying the submission process for researchers</li> </ol>              | 30053264  |
|                    | DMfold           | -                          | DMfold is a single model to predict the secondary structure with pseudoknots of different lncRNAs                                            | <ol style="list-style-type: none"> <li>1. Firstly combining the deep learning and IBPMP</li> <li>2. Using auxiliary sequence to help predict lncRNA secondary structure and using deep learning model to automatically extract RNA features</li> </ol>                                                                                                 | 30886627  |

|                                  |                |                         |                                                                                                                                   |                                                                                                                                                                                                                                                                              |          |
|----------------------------------|----------------|-------------------------|-----------------------------------------------------------------------------------------------------------------------------------|------------------------------------------------------------------------------------------------------------------------------------------------------------------------------------------------------------------------------------------------------------------------------|----------|
|                                  |                |                         |                                                                                                                                   | <p>3. Only using the target sequence as the input for greatly simplifying the method</p> <p>4. Breaking through the restriction of parameter insufficiency in traditional computational methods</p>                                                                          |          |
| LncRNAs subcellular distribution | LncATLAS       | Human                   | LncATLAS is a comprehensive resource of lncRNA localization in human cells based on RNA-seq datasets                              | <p>1. Containing 6,768 GENCODE-annotated lncRNAs in 15 cell lines</p> <p>2. Introducing the relative concentration index as a useful measure of localization</p> <p>3. Using standard GENCODE annotations to ensure its integration with diverse other genomics datasets</p> | 28386015 |
|                                  | LncSLdb        | Human, mouse, fruit fly | LncSLdb collects qualitative and quantitative subcellular localization information of lncRNAs by manually curating the literature | <p>1. Containing information about the subcellular location of &gt;11,000 lncRNA transcripts from 9,494 genes</p> <p>2. Classifying lncRNAs into three basic types and three subtypes with evidence of biological experiments</p>                                            | 30219837 |
|                                  | lncLocator 2.0 | Human                   | lncLocator 2.0 is a cell-line-specific subcellular localization predictor for lncRNAs                                             | <p>1. Constructing benchmark datasets of lncRNA subcellular localization for 15 cell lines</p> <p>2. Predicting lncRNA subcellular localization from sequences by an end-to-end deep model</p>                                                                               | 33630066 |

|                                   |                 |                             |                                                                                                                                                                                                                                                              |                                                                                                                                                                                                                                                             |          |
|-----------------------------------|-----------------|-----------------------------|--------------------------------------------------------------------------------------------------------------------------------------------------------------------------------------------------------------------------------------------------------------|-------------------------------------------------------------------------------------------------------------------------------------------------------------------------------------------------------------------------------------------------------------|----------|
|                                   |                 |                             |                                                                                                                                                                                                                                                              | 3. Finding potential sequence patterns associated with localization compared with other methods                                                                                                                                                             |          |
|                                   | RNALocate v2.0  | 104 species including Human | RNALocate is the most comprehensive map of the subcellular localization of the transcriptome to date                                                                                                                                                         | <ol style="list-style-type: none"> <li>1. Integrating &gt;213,000 RNA subcellular localization entries at 171 locations across 104 species</li> <li>2. Providing a tool named iLoc-lncRNA for predicting the subcellular localization of lncRNAs</li> </ol> | 34551440 |
| LncRNAs comprehensive information | LncRNome        | Human                       | LncRNome integrates biologically oriented datasets and resources on lncRNAs and manual annotations with the aim of providing a one-stop solution for annotation information on lncRNAs                                                                       | <ol style="list-style-type: none"> <li>1. Providing information about essential hairpin and quadruplex motifs in lncRNAs</li> <li>2. Containing experimental and prediction datasets on lncRNA-protein interactions</li> </ol>                              | 23846593 |
|                                   | LncRNA2Function | Human                       | LncRNA2Function is the first ontology-driven web interface for researchers to browse lncRNAs associated with a specific functional term, functional terms associated with a specific lncRNA and functional terms associated with a set of human lncRNA genes | Annotating 9,625 human lncRNAs with enriched functions from RNA-seq datasets of 19 human normal tissues                                                                                                                                                     | 25707511 |

|  |        |                                                                                  |                                                                                                         |                                                                                                                                                                                                                                                                                                                                                                                                                                                                                                                                                             |          |
|--|--------|----------------------------------------------------------------------------------|---------------------------------------------------------------------------------------------------------|-------------------------------------------------------------------------------------------------------------------------------------------------------------------------------------------------------------------------------------------------------------------------------------------------------------------------------------------------------------------------------------------------------------------------------------------------------------------------------------------------------------------------------------------------------------|----------|
|  | LNCat  | Human                                                                            | LNCat is the first analysis of commonalities and differences of 24 publicly lncRNA annotation resources | <ol style="list-style-type: none"> <li>1. Reviewing 24 available lncRNA annotation resources referring to &gt;205,000 lncRNAs in &gt;50 tissues and cell lines</li> <li>2. Characterizing annotation resources from different aspects including exon structure</li> <li>3. Providing a genome browser of lncRNA structures and downloading combinations of lncRNA annotation</li> <li>4. Supporting the rapid exploration, comparison and integration of lncRNA annotation resources</li> </ol>                                                             | 26944085 |
|  | LncVar | H. sapiens,<br>M. musculus,<br>D. rerio,<br>C. elegans,<br>,<br>D. melanogaster, | LncVar is a database on genetic variations associated with lnc genes                                    | <ol style="list-style-type: none"> <li>1. Systematically integrating TF binding sites and m6A modification sites of lncRNAs, and providing comprehensive effects of SNPs on transcription and modification of lncRNAs</li> <li>2. Collecting putatively translated ORFs in lncRNAs, and identifying synonymous and non-synonymous SNPs in ORFs</li> <li>3. Collecting eQTLs of lncRNAs from the literature</li> <li>4. Identifying lncRNAs in CNV regions as prognostic biomarker candidates of tumors, and predicting lncRNA gene fusion events</li> </ol> | 27605101 |

|  |                |                                    |                                                                                                                                     |                                                                                                                                                                                                                                                                                                                                                                                                                                                                                                                                                                                         |          |
|--|----------------|------------------------------------|-------------------------------------------------------------------------------------------------------------------------------------|-----------------------------------------------------------------------------------------------------------------------------------------------------------------------------------------------------------------------------------------------------------------------------------------------------------------------------------------------------------------------------------------------------------------------------------------------------------------------------------------------------------------------------------------------------------------------------------------|----------|
|  |                | A.<br>thaliana                     |                                                                                                                                     | from RNA-seq data from cell lines                                                                                                                                                                                                                                                                                                                                                                                                                                                                                                                                                       |          |
|  | lncRNASNP<br>2 | Human,<br>mouse                    | LncRNASNP2 offers comprehensive information on SNPs and mutations of lncRNAs, and their influences on lncRNA structure and function | <ol style="list-style-type: none"> <li>1. Containing 859,534 non-coding variants from COSMIC cancer data in lncRNAs, and their effects on lncRNA structure and function</li> <li>2. Providing 315,234 cancer mutations in lncRNAs from TCGA and their effects</li> <li>3. Offering lncRNA expression profiling of 20 cancer types in tumor and adjacent samples</li> <li>4. Expanding lncRNA-associated diseases</li> <li>5. Optimizing results on lncRNAs structure change induced by variants</li> <li>6. Reducing false positives in miRNA and lncRNA interaction results</li> </ol> | 29077939 |
|  | LNCediting     | Human,<br>rhesus,<br>mouse,<br>fly | LNCediting provides a useful resource for the functional effects of RNA editing in lncRNAs                                          | <ol style="list-style-type: none"> <li>1. Containing A-to-I editing sites in lncRNAs across four species</li> <li>2. Predicting the effects of editing sites on lncRNA secondary structures and lncRNA-miRNA interactions</li> </ol>                                                                                                                                                                                                                                                                                                                                                    | 27651464 |
|  | LNCipedia 5    | Human                              | LNCipedia 5 provides a complete set of human lncRNAs with better                                                                    | <ol style="list-style-type: none"> <li>1. Providing insights of 1,555 human lncRNAs by curating 2,482 lncRNA publications</li> </ol>                                                                                                                                                                                                                                                                                                                                                                                                                                                    | 30371849 |

|  |          |              |                                                                                                                                              |                                                                                                                                                                                                                                                                                                                                                                                                                           |          |
|--|----------|--------------|----------------------------------------------------------------------------------------------------------------------------------------------|---------------------------------------------------------------------------------------------------------------------------------------------------------------------------------------------------------------------------------------------------------------------------------------------------------------------------------------------------------------------------------------------------------------------------|----------|
|  |          |              | <p>annotations and official HGNC gene names</p>                                                                                              | <ol style="list-style-type: none"> <li>Using official lncRNAs symbols when available</li> <li>Developing an improved filtering pipeline for a higher quality reference lncRNA gene set</li> </ol>                                                                                                                                                                                                                         |          |
|  | LncBook  | Human        | <p>LncBook is a comprehensive collection of human lncRNAs by multi-omics data integration, functional annotation and disease association</p> | <ol style="list-style-type: none"> <li>Containing 270,044 lncRNAs and 1,867 characterized lncRNAs with 3,762 lncRNA-function associations</li> <li>Integrating abundant multi-omics data from expression, methylation, genome variation and lncRNA-miRNA interaction</li> <li>Identifying 3,772 experimentally validated lncRNA-disease associations and 97,998 lncRNAs that are putatively disease-associated</li> </ol> | 30715521 |
|  | AnnoLnc2 | Human, mouse | <p>AnnoLnc2 is the most comprehensive annotation tool for novel lncRNAs in humans and mice in 2020</p>                                       | <ol style="list-style-type: none"> <li>Systematically annotating new lncRNA information, including sequences, structure, expression, regulation, genetic association, and evolution</li> <li>Providing a novel module for assessing lncRNAs subcellular localization based on separated nucleus/cytosol profiling data</li> <li>Updating CLIP-seq dataset, which contains 188 human RBPs and 62 mouse RBPs of</li> </ol>  | 32406920 |

|  |          |       |                                                                                                                                                                                                                                                                                             |                                                                                                                                                                                                                                                                                                                                                                                                                                                                                                                                         |          |
|--|----------|-------|---------------------------------------------------------------------------------------------------------------------------------------------------------------------------------------------------------------------------------------------------------------------------------------------|-----------------------------------------------------------------------------------------------------------------------------------------------------------------------------------------------------------------------------------------------------------------------------------------------------------------------------------------------------------------------------------------------------------------------------------------------------------------------------------------------------------------------------------------|----------|
|  |          |       |                                                                                                                                                                                                                                                                                             | lncRNAs<br>4. Providing a fully functional standalone package for large-scale offline analysis                                                                                                                                                                                                                                                                                                                                                                                                                                          |          |
|  | LncSEA   | Human | LncSEA focuses on accommodating various available resources of human lncRNAs, and performing annotation and enrichment analyses of lncRNA lists submitted by users                                                                                                                          | <ol style="list-style-type: none"> <li>1. Supporting &gt;40,000 reference lncRNA sets across 18 categories, and 66 sub-categories, including &gt;50,000 lncRNAs</li> <li>2. Collecting ChIP-seq, DNase-seq, ATAC-seq, and H3K27ac ChIP-seq data from hundreds of human cell types to identify a large number of lncRNA sets regulated by upstream TFs and DNA regulatory elements</li> <li>3. Simultaneously performing lncRNA set enrichment analyses associated with upstream regulators and downstream targets of lncRNAs</li> </ol> | 33045741 |
|  | LncExpDB | Human | LncExpDB provides comprehensive expression profiles of lncRNA genes, exploring their expression features and capacities, identifying featured genes with potentially important functions, and building interactions with protein-coding genes across various biological contexts/conditions | <ol style="list-style-type: none"> <li>1. Collecting the expression profiles of 101,293 human lncRNA genes derived from 1,977 samples of 337 biological conditions across 9 biological contexts;</li> <li>2. Estimating lncRNA genes expression reliability and capacities, and identifying 25,191 characterized genes, and further obtaining 28,443,865 lncRNA-mRNA interactions</li> </ol>                                                                                                                                            | 33045751 |

|  |              |                                                                |                                                                                                                                                            |                                                                                                                                                                                                                                                                                                                                                                                                                                                                                                                                                                           |          |
|--|--------------|----------------------------------------------------------------|------------------------------------------------------------------------------------------------------------------------------------------------------------|---------------------------------------------------------------------------------------------------------------------------------------------------------------------------------------------------------------------------------------------------------------------------------------------------------------------------------------------------------------------------------------------------------------------------------------------------------------------------------------------------------------------------------------------------------------------------|----------|
|  | LncRBase V.2 | Human, rat, the fruit fly, zebrafish, chicken, cow, C. elegans | LncRBase V.2 is a readily available source of tissue-specific expression of lncRNAs corresponding to multiple species.                                     | <ol style="list-style-type: none"> <li>1. Providing TF binding sites in the lncRNA promoter region</li> <li>2. Searching subcellular localization of lncRNAs</li> <li>3. Predicting possible sORFs within lncRNAs;</li> <li>4. Integrating target molecules and disease association of lncRNA genes</li> <li>5. Offering distribution of lncRNAs in multiple tissues across species</li> <li>6. Hosting ClinicLSNP in LncRBase V.2, which has a comprehensive catalog of lncRNAs originating from 561 RNA-seq datasets of breast, ovarian and cervical cancers</li> </ol> | 33112702 |
|  | NONCODE V6   | Human, mice, plants                                            | NONCODE V6 is a comprehensive database of collection and annotation of ncRNAs, particularly lncRNAs in both animals and plants                             | <ol style="list-style-type: none"> <li>1. Increasing the number of lncRNAs since 2017;</li> <li>2. Updating human lncRNA-disease associations, particularly cancer</li> </ol>                                                                                                                                                                                                                                                                                                                                                                                             | 33196801 |
|  | LincSNP 3.0  | Human                                                          | LincSNP 3.0 aims specifically to store and annotate disease or phenotype-associated variants and RNA editing in human lncRNAs or their regulatory elements | <ol style="list-style-type: none"> <li>1. Adding more types of variants, including SNPs and somatic mutations in human lncRNAs</li> <li>2. Expanding regulatory elements including TF binding sites, enhancers and topologically</li> </ol>                                                                                                                                                                                                                                                                                                                               | 33219661 |

|  |              |                                                |                                                                                                                                                                                             |                                                                                                                                                                                                                                                                                                                                                                                                                                                                                                                                                      |          |
|--|--------------|------------------------------------------------|---------------------------------------------------------------------------------------------------------------------------------------------------------------------------------------------|------------------------------------------------------------------------------------------------------------------------------------------------------------------------------------------------------------------------------------------------------------------------------------------------------------------------------------------------------------------------------------------------------------------------------------------------------------------------------------------------------------------------------------------------------|----------|
|  |              |                                                |                                                                                                                                                                                             | <p>associated domains</p> <p>3. Collecting more experimentally supported variant-lncRNA-disease /phenotype associations</p>                                                                                                                                                                                                                                                                                                                                                                                                                          |          |
|  | ColorCells   | Human, mouse, rat, zebrafish, yeast, fruit fly | ColorCells is a database of comparative analysis of lncRNAs and mRNAs expression, classification and functions in scRNA-seq data                                                            | <p>1. Collecting scRNA-seq datasets of 205 studies from six species, and classifying cell clusters based on lncRNAs, mRNAs and all RNAs</p> <p>2. Displaying results by principal component analysis and T-distributed stochastic neighbor embedding algorithm in two-and three-dimensional space</p> <p>3. Performing cell-cell similarities estimation by shared nearest neighbor and Pearson correlation methods</p> <p>4. Predicting the function of lncRNA and protein-coding genes in each group through gene function enrichment analysis</p> | 33313674 |
|  | exoRBase 2.0 | Human                                          | exoRBase 2.0 remains the only online resource available for exploring biotypes of different long RNA, including mRNAs, lncRNAs and circRNAs, in EVs in human normal and cancerous biofluids | <p>1. Containing 905 exLR-seq data from four types of human biofluids that were collected from healthy individuals and patients with 13 types of cancer or other diseases</p> <p>2. Obtaining annotation information and expression profiles of 19,643 mRNAs, 15,645</p>                                                                                                                                                                                                                                                                             | 34918744 |

|                             |       |              |                                                                                                                                                                                                                 |                                                                                                                                                                                                                                                                                                       |          |
|-----------------------------|-------|--------------|-----------------------------------------------------------------------------------------------------------------------------------------------------------------------------------------------------------------|-------------------------------------------------------------------------------------------------------------------------------------------------------------------------------------------------------------------------------------------------------------------------------------------------------|----------|
|                             |       |              |                                                                                                                                                                                                                 | lncRNAs and 79,084 circRNAs in EVs<br>3. Covering the enrichment scores of 11,536 Molecular Signatures Database pathways for each sample generated by ssGSEA on exLR expression profiles                                                                                                              |          |
| lncRNAs function prediction | SEEKR | Human, mouse | SEEKR is a method to compare sequence content between any group of lncRNAs to quantify nonlinear homology for predicting protein binding, structure and subcellular localization of lncRNAs via k-mer signature | 1. Revealing that evolutionarily unrelated lncRNAs can encode similar function through different spatial arrangements of related sequence motifs<br>2. Demonstrating that k-mer-based classification is a powerful approach to detect recurrent associations between sequence and function in lncRNAs | 30224646 |

lncRNAs, long non-coding RNAs; CHIP, chromatin immunoprecipitation; seq, sequencing; TFs, transcriptional factors; PCG, protein coding gene; miRNA, microRNA; FORNA, force-directed RNA; IBPMP, improved base pair maximization principle; lnc, long non-coding; SNPs, single nucleotide polymorphisms; ORFs, open reading frames; eQTLs, expression quantitative trait locis; CNV, copy number variation; TCGA, The Cancer Genome Atlas; A, adenoine; I, inosine; HGNC, HUGO Gene Nomenclature Committee; CLIP, cross-linking and immunoprecipitation; RBPs, RNA binding proteins; DNase, deoxyribonuclease; ATAC, Assay for Transposase Accessible Chromatin; H3K27ac, acetylation of histone 3 on lysine (K)-27; sORFs, small open reading frames; ncRNAs, non-coding RNAs; scRNA, single-cell RNA; circRNAs, circular RNAs; EVs, extracellular vesicles; exLR, EV Long RNA; ssGSEA, single sample Gene set Enrichment Analysis.

Table SII. Databases of lncRNAs associated with DNAs.

| Databases   | Origins                                                                                                  | Usage                                                                                                                | Advantages                                                                                                                                                                                                                                                                                                                                                               | PubMed ID |
|-------------|----------------------------------------------------------------------------------------------------------|----------------------------------------------------------------------------------------------------------------------|--------------------------------------------------------------------------------------------------------------------------------------------------------------------------------------------------------------------------------------------------------------------------------------------------------------------------------------------------------------------------|-----------|
| Triplexator | <i>H. sapiens</i> , <i>M. musculus</i> ,<br><i>D. rerio</i> , <i>D. melanogaster</i> , <i>C. elegans</i> | Triplexator can predict whether nuclear lncRNAs have the potential to interact with genomic DNA by forming a triplex | <ol style="list-style-type: none"> <li>1. Identifying potential TFO in lncRNAs single-strand</li> <li>2. Identifying suitable TTS in DNA double-stranded nucleotide sequences</li> </ol>                                                                                                                                                                                 | 22550012  |
| LongTarget  | Human, mouse                                                                                             | LongTarget can predict lncRNA DNA-binding motif and binding sites                                                    | <ol style="list-style-type: none"> <li>1. Expanding base-pairing rules including canonical and potential non-canonical rules between lncRNAs and DNA</li> <li>2. Determining the single best TFO sequences on lncRNA in triplexes</li> <li>3. Determining the best TFO's TTSs in DNA of triplexes in a genome region</li> <li>4. Evaluating triplex stability</li> </ol> | 25262155  |
| Lnc2Meth    | Human                                                                                                    | Lnc2Meth explores the associations of lncRNAs and DNA methylation in various human disorders                         | <ol style="list-style-type: none"> <li>1. Abundant DNA methylation profiles for lncRNAs and protein coding genes (PCGs) in diseases</li> <li>2. Providing prognostic values for each lncRNA transcript from clinical data</li> <li>3. Identifying differential methylation patterns for lncRNAs and PCGs with external datasets</li> </ol>                               | 29069510  |

|                  |              |                                                                                                                                      |                                                                                                                                                                       |          |
|------------------|--------------|--------------------------------------------------------------------------------------------------------------------------------------|-----------------------------------------------------------------------------------------------------------------------------------------------------------------------|----------|
| LnChrom          | Human, mouse | LnChrom can search lncRNA-chromatin interaction, and help to determine the effects of lncRNA-chromatin interaction on targeted genes | LnChrom provides the first comprehensive map of lncRNA interactions with chromatin, and contains 382,743 interactions involving 2,390 lncRNAs and 34,345 target genes | 29788225 |
| Fasim-LongTarget | Human, mouse | Fasim-LongTarget is a novel tool for predicting genome-wide lncRNA/DNA binding                                                       | 1. It is 200-fold faster than LongTarget<br>2. It is more accurate than TDF<br>It is feasible for genome-wide prediction of lncRNA/DNA binding                        | 35832611 |

LncRNAs, long non-coding RNAs.

Table SIII. Databases of lncRNAs interaction with RNAs.

| Databases     | Origins                               | Usage                                                                                                                                                                 | Merits                                                                                                                                                                                                                                                                                                                                                                                                                                                                                                                  | PMID     |
|---------------|---------------------------------------|-----------------------------------------------------------------------------------------------------------------------------------------------------------------------|-------------------------------------------------------------------------------------------------------------------------------------------------------------------------------------------------------------------------------------------------------------------------------------------------------------------------------------------------------------------------------------------------------------------------------------------------------------------------------------------------------------------------|----------|
| Starbase v2.0 | CLIP-seq of 14 kinds of tumor samples | Starbase v2.0 exhibited the most comprehensive miRNA-lncRNA interaction networks in 2014                                                                              | <ol style="list-style-type: none"> <li>1. Identifying RNA-RNA interaction networks from 108 CLIP-seq datasets generated by 37 independent studies systematically</li> <li>2. Providing the most comprehensive CLIP-seq experimentally supported miRNA-lncRNA interaction networks in 2014</li> <li>3. Developing ceRNAFunction web servers to predict the function of lncRNAs from miRNA-mediated regulatory networks</li> </ol>                                                                                        | 24297251 |
| RISE          | human, mouse, yeast                   | RISE is a comprehensive database of RNA interactome from transcriptome-wide and targeted sequencing-based experiments, and several primary databases and publications | <ol style="list-style-type: none"> <li>1. Containing 328,811 RRIs, while &gt;50% of the RRIs are among mRNA and lncRNAs</li> <li>2. Providing details of the interacting sites</li> <li>3. Offering extensive annotations for each RRI</li> </ol>                                                                                                                                                                                                                                                                       | 29040625 |
| LnCeVar       | Human                                 | LnCeVar documents personalized lncRNA-variation-ceRNA events from published literature and high-throughput identification from individual genomics data.              | <ol style="list-style-type: none"> <li>1. Containing &gt;2,000 experimentally supported circulating, drug-resistant and prognosis-related lncRNA biomarkers</li> <li>2. Integrating expression profiles of ceRNAs and individual clinical information from &gt;10,000 samples from TCGA, COSMIC and 1000 Genomes Project</li> <li>3. Developing several tools for users to perform following analyses: Searching ceRNAs; identifying dysregulated cancer hallmarks of variation-ceRNA events; performing COX</li> </ol> | 31617563 |

|                  |                            |                                                                                                                                                                                |                                                                                                                                                                                                                                                                                                                                                                                                                                                                                              |          |
|------------------|----------------------------|--------------------------------------------------------------------------------------------------------------------------------------------------------------------------------|----------------------------------------------------------------------------------------------------------------------------------------------------------------------------------------------------------------------------------------------------------------------------------------------------------------------------------------------------------------------------------------------------------------------------------------------------------------------------------------------|----------|
|                  |                            |                                                                                                                                                                                | regression analyses and producing survival curves for variation–ceRNA events                                                                                                                                                                                                                                                                                                                                                                                                                 |          |
| DIANA-LncBase v3 | Human, mouse               | DIANA-LncBase v3.0 is a reference repository with experimentally supported miRNA targets on non-coding transcripts from publications and analysis of >300 high-throughput data | <ol style="list-style-type: none"> <li>1. It is the first database to employ a CLIP-seq-guided algorithm and microCLIP framework to analyze 236 AGO-CLIP-Seq libraries and catalog 370,000 miRNA binding events</li> <li>2. Providing 500,000 entries, corresponding to 240,000 unique tissue and cell type specific miRNA-lncRNA pairs</li> <li>3. Containing &gt;67,000 experimentally supported target sites and lncRNA expression profiles in different cellular compartments</li> </ol> | 31732741 |
| RNAInter v4.0    | 28 species including human | RNAInter v4.0 provides a comprehensive RNA interactome platform from manually text mining, database integration and computational prediction                                   | <ol style="list-style-type: none"> <li>1. Achieving a redefined confidence scoring system</li> <li>2. Exhibiting an updated interface that enables fast retrieval and browsing of RRIs</li> <li>3. Containing &gt;4,700,000 entries collected from the literature and six databases</li> </ol>                                                                                                                                                                                               | 34718726 |
| LncACTdb 3.0     | 25 species including human | LncACTdb 3.0 is a comprehensive database of experimentally supported interactions among ceRNA and corresponding personalized networks thus contributing to precision medicine  | <ol style="list-style-type: none"> <li>1. Collecting 5,669 experimentally validated ceRNA interactions in 537 diseases/phenotypes</li> <li>2. Containing personalized ceRNA interactions and networks for 16,228 patients from 62 datasets in TCGA and GEO</li> <li>3. Containing subcellular and extracellular vesicle locations of ceRNA</li> <li>4. Describing &gt;10,000 experimentally supported lncRNA biomarkers associated with tumor diagnosis and therapy</li> </ol>               | 34850125 |

|  |  |  |                                                                                                                                     |  |
|--|--|--|-------------------------------------------------------------------------------------------------------------------------------------|--|
|  |  |  | 5. Containing lncRNA/mRNA/miRNA expression profiles with clinical and pathological information of thousands of patients with cancer |  |
|--|--|--|-------------------------------------------------------------------------------------------------------------------------------------|--|

LncRNAs, long non-coding RNAs; CLIP, cross-linking and immunoprecipitation; seq, sequencing; miRNA, microRNA; RRI, RNA-RNA interactions; mRNA, messenger RNA; ceRNA, competing endogenous RNA; TCGA, The Cancer Genome Atlas; AGO, argonaute; GEO, Gene Expression Omnibus.

Table SIV. Databases of lncRNAs encoding potential or confirmed interaction with proteins.

| Focus                         | Databases | Origins                                                  | Usage                                                                                                                                                                                                               | Merits                                                                                                                                                                                                                                                                                                                                                                                                                                          | PubMed ID |
|-------------------------------|-----------|----------------------------------------------------------|---------------------------------------------------------------------------------------------------------------------------------------------------------------------------------------------------------------------|-------------------------------------------------------------------------------------------------------------------------------------------------------------------------------------------------------------------------------------------------------------------------------------------------------------------------------------------------------------------------------------------------------------------------------------------------|-----------|
| Encoding potential of lncRNAs | CPPred    | Human                                                    | CPPred can provide the isoelectric point, hydrophobicity and stability of a predicted peptide translated by RNA transcripts to distinguish coding RNAs and ncRNAs, particularly small coding RNAs and small ncRNAs. | <ol style="list-style-type: none"> <li>1. Plotting ORF length, Fickett score and Hexamer score in three dimensions for 33,360 coding RNAs, 24,163 ncRNAs and 1,016 small RNA transcripts</li> <li>2. Firstly proposing that composition, transition and distribution of predicted peptides could be used to distinguish coding RNAs from ncRNAs in eukaryotes</li> <li>3. Only using FASTA format sequence files as necessary inputs</li> </ol> | 30753596  |
|                               | CNIT      | 11 animal species including humans, and 27 plant species | CNIT can predict protein-coding or non-coding sequences generated by high-throughput sequencing data, and analyze sequence features across species.                                                                 | <ol style="list-style-type: none"> <li>1. It is faster and more accurate than the former CNCI</li> <li>2. It is applicable for species that lack a whole-genome sequence or annotated information</li> <li>3. It is freely available as an online or offline tool</li> </ol>                                                                                                                                                                    | 31147700  |
|                               | LncPep    | 39 species including human                               | LncPep can be used to evaluate the coding potential of lncRNAs, and provide a convenient interface to                                                                                                               | <ol style="list-style-type: none"> <li>1. Containing 10,580,228 peptides that were predicted to be translated from 883,804 lncRNAs</li> <li>2. Predicting the coding potential of</li> </ol>                                                                                                                                                                                                                                                    | 35141219  |

|                           |                     |                                                                                                                                                                                                                                               |                                                                                                                           |                                                                                                                                                                                                                                                                                                                                                                                                                                                                                                    |          |
|---------------------------|---------------------|-----------------------------------------------------------------------------------------------------------------------------------------------------------------------------------------------------------------------------------------------|---------------------------------------------------------------------------------------------------------------------------|----------------------------------------------------------------------------------------------------------------------------------------------------------------------------------------------------------------------------------------------------------------------------------------------------------------------------------------------------------------------------------------------------------------------------------------------------------------------------------------------------|----------|
|                           |                     |                                                                                                                                                                                                                                               | browse information of each lncRNA and its translated peptide                                                              | novel lncRNAs transcripts based on user-customized sequences<br>3. Providing a download option for full datasets of LncPep for users' further exploration                                                                                                                                                                                                                                                                                                                                          |          |
| Interaction with proteins | catRAPID omics v2.0 | <i>Homo sapiens</i> ,<br><i>Mus musculus</i> ,<br><i>Rattus norvegicus</i> ,<br><i>Xenopus tropicalis</i> ,<br><i>Danio rerio</i> ,<br><i>Drosophila melanogaster</i> ,<br><i>Caenorhabditis elegans</i> ,<br><i>Saccharomyces cerevisiae</i> | catRAPID omics v2.0 web server is a powerful tool for the characterization and classification of RNA-protein interactions | 1. Listing integration of the sequence fragmentation approach to identify binding regions in proteins and lncRNAs<br>2. Providing calculation of lncRNA-binding abilities of proteins<br>3. Exploiting orthology associations to explore the evolutionary conservation of predicted lncRNA-protein interactions<br>4. For the 500 most interacting lncRNA-protein pairs, the software calculates lncRNA-protein binding sites to increase the power and resolution of their high-throughput method | 34086933 |
|                           | SFPEL-LPI           | -                                                                                                                                                                                                                                             | SFPEL-LPI can predict uncleared interactions between lncRNAs and proteins                                                 | Integrating sequence-derived features and similarities with a feature projection ensemble learning frame                                                                                                                                                                                                                                                                                                                                                                                           | 30533006 |

lncRNAs, long non-coding RNAs; ncRNAs, non-coding RNAs; ORF, open reading frame; CNCI, Coding-Non-Coding Index.
